# Supplementary material for: miR205 inhibits stem cell renewal in SUM159PT breast cancer cells
Source: PubMed Central journal article supplement (PMC5705145; doi:10.1371/journal.pone.0188637), 2017-11-28
Supplement: pone.0188637.s001.pdf [file pone.0188637.s001.pdf]

**S1 Table Detailed information for antibodies used in this work.**

| <b>Name</b>                          | <b>Type</b>       | <b>Supplier</b>                | <b>Catalog #</b> | <b>Origin</b>           | <b>Dilution Ratio IB*</b> |
|--------------------------------------|-------------------|--------------------------------|------------------|-------------------------|---------------------------|
| c-Myc (N-262)                        | rabbit polyclonal | Santa Cruz Biotechnology, Inc. | Sc-764           | Dallas, TX, USA         | 1:1000                    |
| $\beta$ -Actin                       | mouse monoclonal  | Sigma-Aldrich (Merck)          | A5441            | San Luis, MI, USA       | 1:1000                    |
| p27 <sup>Kip1</sup> (Clone G173-524) | mouse monoclonal  | BD-Biosciences                 | #554069          | Franklin Lakes, NJ, USA | 1:1000                    |
| c-Src (Src 2)                        | rabbit polyclonal | Santa Cruz Biotechnology, Inc. | sc-18            | Dallas, TX, USA         | 1:1000                    |
| Cyclin D1 (H-295)                    | rabbit polyclonal | Santa Cruz Biotechnology, Inc. | sc-753           | Dallas, TX, USA         | 1:500                     |
| pY418-c-Src                          | rabbit polyclonal | Invitrogen                     | #44660G          | Camarillo, CA, USA      | 1:100                     |
| ALDH1                                | mouse monoclonal  | BD-Biosciences                 | #611194          | Franklin Lakes, NJ, USA | 1:1000                    |
| ErB-3 (C-17)                         | rabbit polyclonal | Santa Cruz Biotechnology, Inc. | sc-285           | Dallas, TX, USA         | 1:1000                    |
| Lyn A/B (H-6)                        | mouse monoclonal  | Santa Cruz Biotechnology, Inc. | sc-7274          | Dallas, TX, USA         | 1:1000                    |
| Fyn (FYN3)                           | rabbit polyclonal | Santa Cruz Biotechnology, Inc. | sc-16            | Dallas, TX, USA         | 1:1000                    |
| VEGF-A (A-20)                        | rabbit polyclonal | Santa Cruz Biotechnology, Inc. | sc-53462         | Dallas, TX, USA         | 1:1000                    |
| E2A.E12                              | rabbit polyclonal | Santa Cruz Biotechnology, Inc. | sc-133075        | Dallas, TX, U.S.A       | 1:500                     |
| Zeb-1 (E-20)                         | goat-polyclonal   | Santa Cruz Biotechnology, Inc. | sc--10572        | Dallas, TX, USA         | 1:1000                    |

|                     |                   |                                 |           |                         |        |
|---------------------|-------------------|---------------------------------|-----------|-------------------------|--------|
| Stat3               | mouse monoclonal  | BD-Biosciences                  | S21320    | Franklin Lakes, NJ, USA | 1:2000 |
| pY705-Stat3         | rabbit polyclonal | Cell Signaling Technology, Inc. | #9131     | Danvers, MA, USA        | 1:1000 |
| Twist 1/2           | rabbit polyclonal | Gene Tex, Inc.                  | GTX127310 | Irvine, CA, USA         | 1:1000 |
| CK5                 | rabbit polyclonal | ABCAM                           | ab52635   | Cambridge, UK           | 1:5000 |
| GAPDH (clone 6C5)   | mouse monoclonal  | Millipore (Merk)                | CB1001    | Billerica, MA, USA      | 1:4000 |
| PARP (Clone C-2-10) | mouse monoclonal  | Biomol GmbH                     | SA-249    | Hamburg, Germany        | 1:1000 |
| TAZ (WWTR1)         | rabbit polyclonal | Santa Cruz Biotechnology, Inc.  | HPA007415 | Danvers, MA, USA        | 1:250  |
| Snail 1             | mouse monoclonal  | Cell Signaling Technology, Inc. | LF062     | Danvers, MA, USA        | 1:100  |
| CD44 (Clone HP 2/9) | mouse monoclonal  | Gift from Dr, Sanchez-Madrid    |           | Madrid, Spain           | 1:1000 |
| MMP9                | rabbit polyclonal | Millipore (Merk)                | AB19016   | Billerica, MA, USA      | 1:1000 |

**\*, Immunoblotting (IB)**

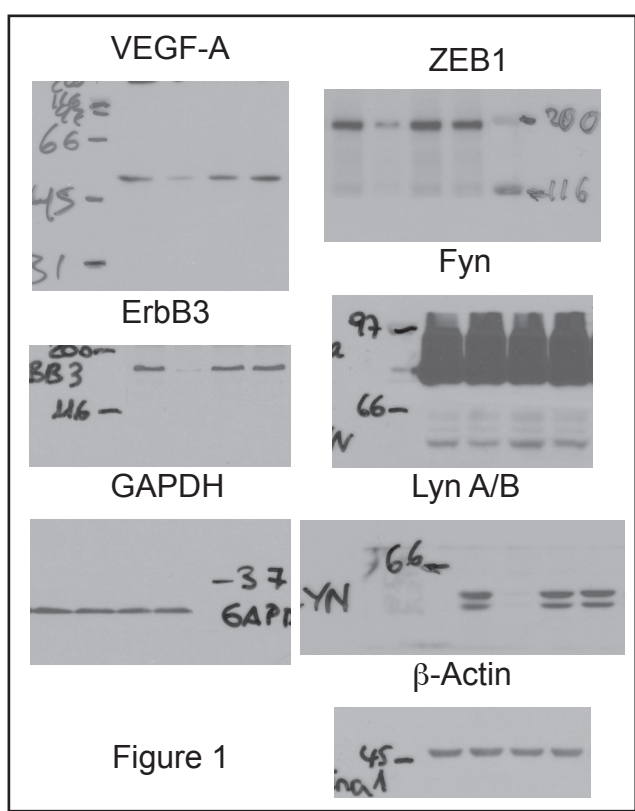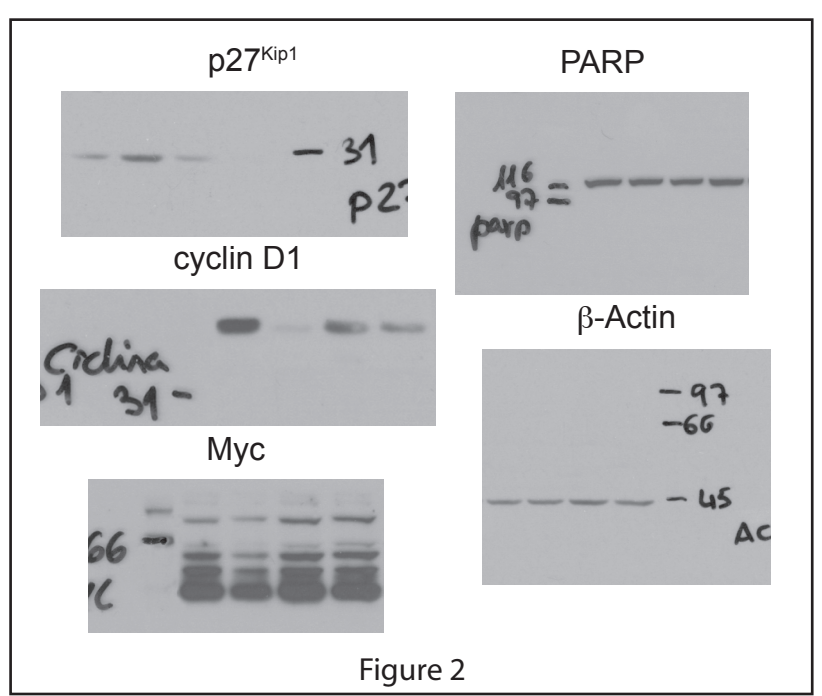

Figure 2

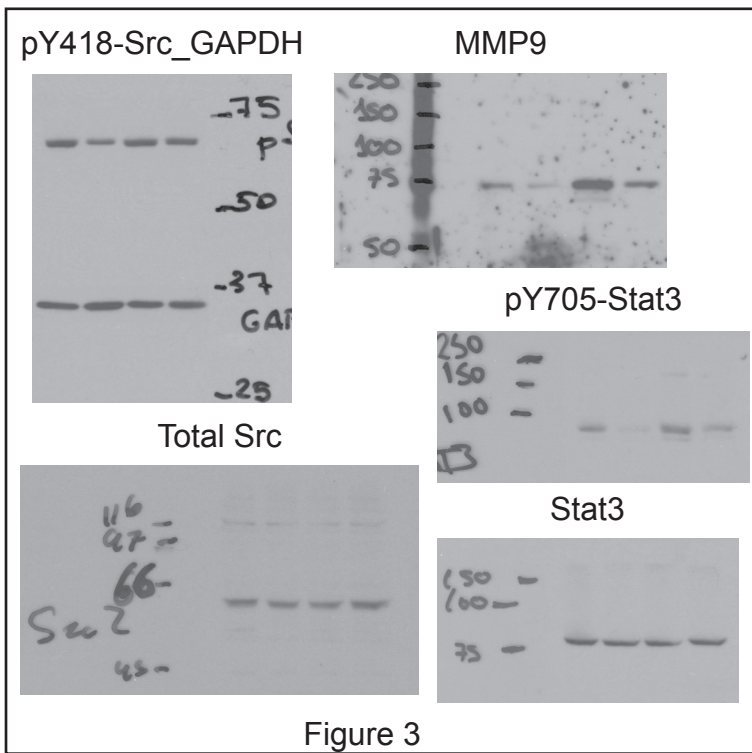

Figure 3

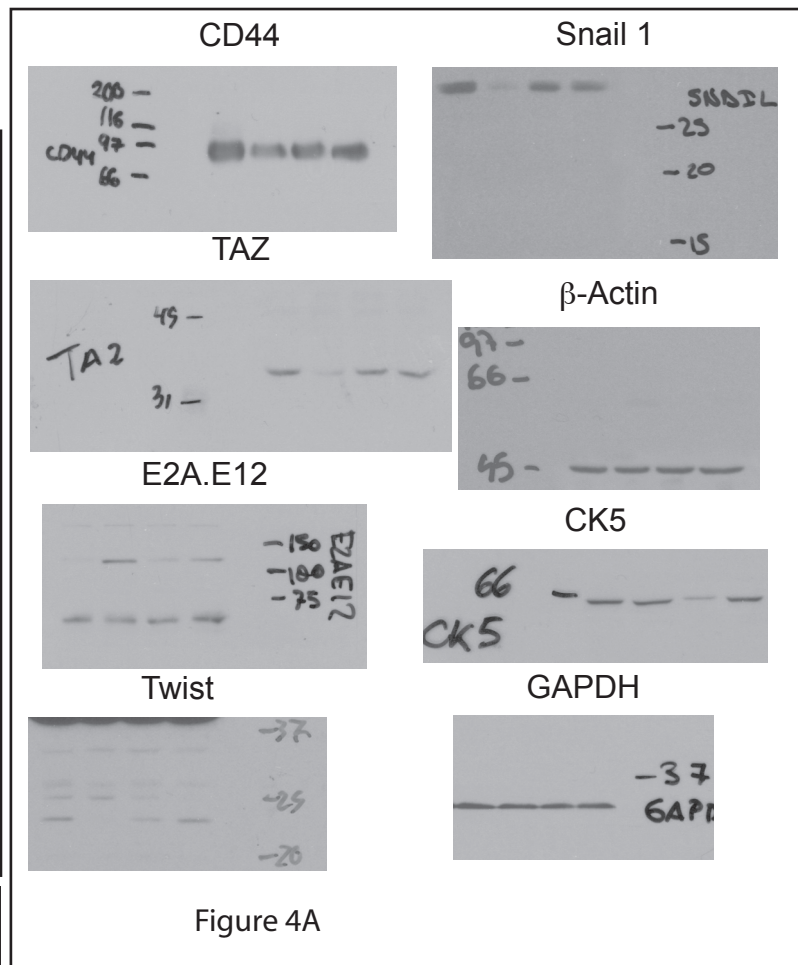

Figure 4A

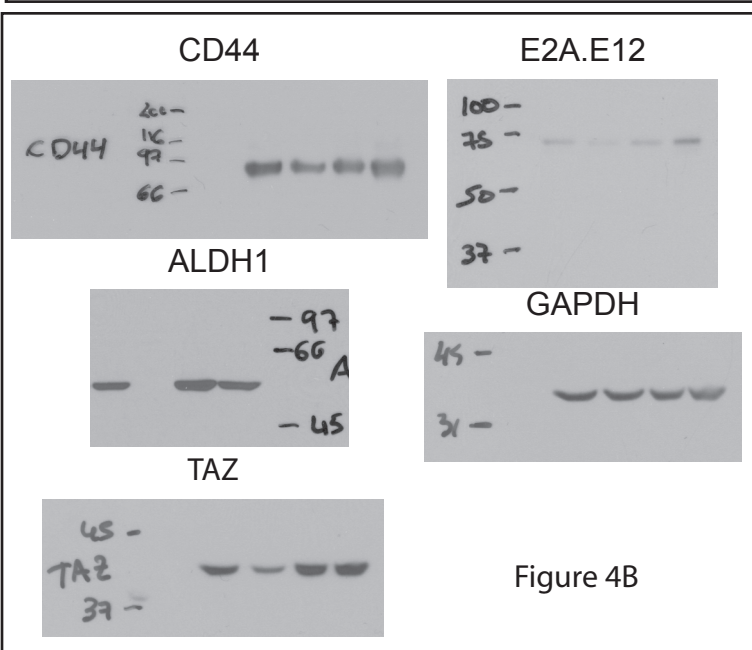

Figure 4B
